# Supplementary material for: CS1003, a novel human and mouse cross-reactive PD-1 monoclonal antibody for cancer therapy
Source: Springer Nature journal article supplement (doi:10.1038/s41401-020-0422-6), 2020-05-28
Supplement: 41401_2020_422_MOESM1_ESM.doc [file 41401_2020_422_MOESM1_ESM.doc]

**Supplementary Figure 1**


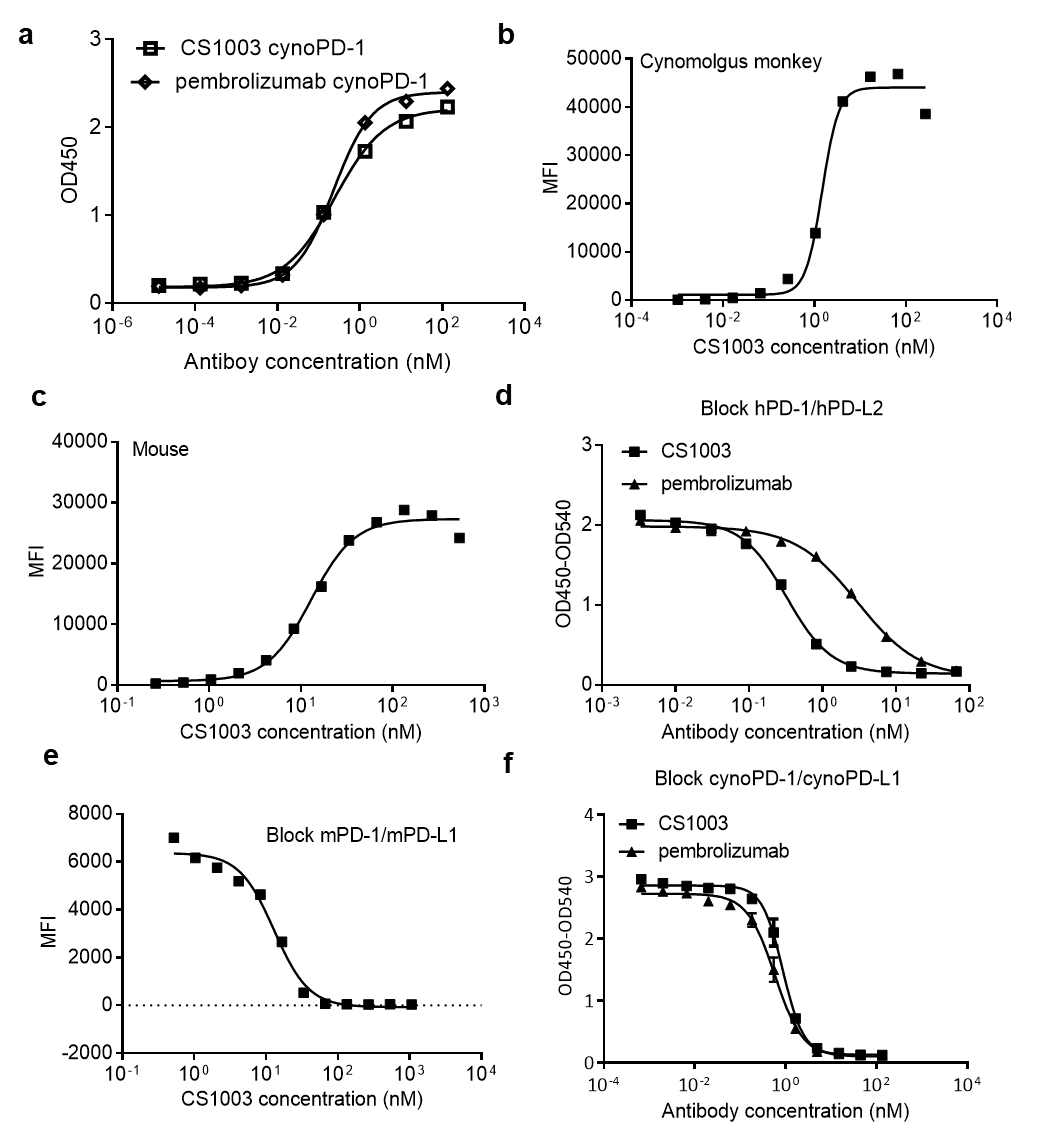


**Supplementary Figure 1:** PD-1 antibodies bind to PD-1 and block the PD-1/PD-L1 and PD-1/PD-L2 interaction. (a) Binding of PD-1 antibody to plate coated recombinant cynomolgus PD-1 proteins was assessed by ELISA. (b-c) Binding of PD-1 antibody to cell surface cynomolgus and mouse PD-1 was determined by FACS. (d-f) Functionality of PD-1 antibody in blocking human PD-1/PD-L2, cynomolgus or mouse PD-1/PD-L1 interactions were assessed by flowcytometry or ELISA respectively.

**Supplementary Figure 2**


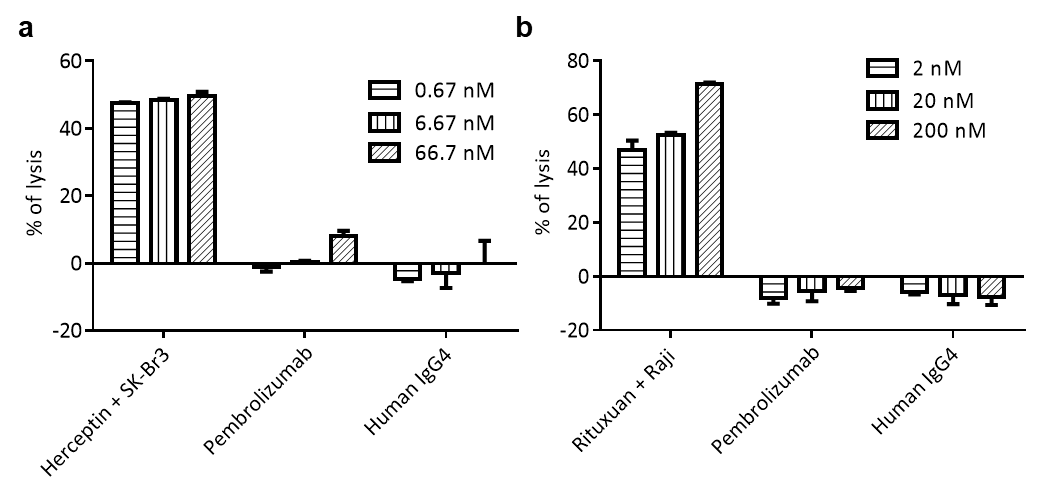


Supplementary Figure 2: pembrolizumab showed no ADCC (a) and CDC (b) activity

**Supplementary Table 1.** FACS analysis of CS1003 on both parental CHO-S cells and human PD-1 expressing CHO-S cells

| MFI | CHO-S | W305-CHO-S.hPro1.C6* |
| --- | --- | --- |
| CS1003 (66.7 nM) | 42.5 | 14300 |
| Human IgG4  (66.7 nM) | 39.4 | 37.1 |

* W305-CHO-S.hPro1.C6: human PD-1 expressing CHO-S cells
